# Supplementary material for: Cross-sectional study of calves from Norwegian dairy herds with enzootic pneumonia: pathogen occurrence, antimicrobial resistance, culture result interpretation, and sampling site agreement
Source: Research Square preprint supplement (doi:10.21203/rs.3.rs-6534677/v1), 2025-06-24
Supplement: Supplementary file 2 [file 272d21297ca488343f13b8f4.docx]

**Additional file 3**

**Table S4:** Antimicrobial panel with interpretative categories and inhibition zone diameter breakpoints for *Pasteurellaceae* spp.

|  |  | Inhibition zone diameters (mm) | | |  |
| --- | --- | --- | --- | --- | --- |
| **Antimicrobial agent** | **Disc content, µg** | **Susceptible** | **Intermediate** | **Resistant** | **Reference** |
| Benzylpenicillin | 10 | ≥ 17 | - | ≤ 16 | EUCAST, Clinical breakpoints (v14.0), 2024 |
| Amoxicillin-clavulanic acid | 30 | ≥ 15 | - | ≤ 14 | EUCAST, Clinical breakpoints (v14.0), 2024 |
| Trimethoprim + Sulfamethoxazole | 1.25/23.75 | ≥ 23 | - | ≤ 22 | EUCAST, Clinical breakpoints (v14.0), 2024 |
| Tetracycline | 30 | ≥ 24 | - | ≤ 23 | EUCAST, Clinical breakpoints (v14.0), 2024 |
| Enrofloxacin | 5 | ≥ 21 | 17-20 | ≤ 16 | CLSI, VET01S ED7, 2024 |
| Florfenicol | 30 | ≥ 19 | 15-18 | ≤ 14 | CLSI, VET01S ED7, 2024 |
| Streptomycin | 10 | ≥ 15 | 12-14 | ≤ 11 | CLSI, M100-ED34, 2024 |

Abbreviations: EUCAST = European Committee on Antimicrobial Susceptibility Testing; CLSI = Clinical and Laboratory Standards Institute. Inhibition zone diameter breakpoints (millimeters) determined if *Pasteurellaceae* spp. isolates were susceptible, intermediate, or resistant to an antimicrobial. The intermediate category implies that the bacteria is susceptible at increased exposure (EUCAST, 2024) or in body sites where the AM is physiologically concentrated (CLSI, 2024). For streptomycin, EUCAST and CLSI do not define breakpoints for *Pasteurellaceae* spp. and we therefore applied those of *Enterobacteriaceae* spp. instead, as done in a previous study (1).

**References**

1. Maynou G, Bach A, Terré M. Feeding of waste milk to Holstein calves affects antimicrobial resistance of Escherichia coli and Pasteurella multocida isolated from fecal and nasal swabs. Journal of Dairy Science. 2017;100(4):2682-94.
