# Supplementary material for: Cross-sectional study of calves from Norwegian dairy herds with enzootic pneumonia: pathogen occurrence, antimicrobial resistance, culture result interpretation, and sampling site agreement
Source: Research Square preprint supplement (doi:10.21203/rs.3.rs-6534677/v1), 2025-06-24
Supplement: Supplementary file 3 [file 2e3f6f297e57451f22e527cb.docx]

**Additional file 1**

**Table S1:** Key information of dairy herds and enrolled calves.

| **Farm data** | | | | | | | |
| --- | --- | --- | --- | --- | --- | --- | --- |
| **Background** | | | | | **Calves sampled** | | |
| ***Farm ID*** | ***Region in Southern Norway*** | ***Herd size***  ***(cow-years)*** | ***No. of calves diagnosed with BRD two years prior to sampling (no. of individuals)***  *Year 1 Year 2* | | ***No. of calves sampled* (no of pens)2** | ***Age (days)***  Range (mean; median) | ***Weight (kg)3***  Range (mean; median) |
| A | South-east | 62.6 | 11 (10) | 23 (20) | 20 (4) | 11-293 (117; 83) | 46-291 (125; 111) |
| B | South-east | 61.2 | 33 (25) | 47 (36) | 20 (3) | 25-107 (73; 76.5) | 63-119 (94.2; 95) |
| C | South-west | 109 | 56 (45) | 47 (42) | 15 (5) | 30-116 (76.5; 82) | 67-160 (110; 107) |
| D | North-west | 102.5 | 11 (10) | 31 (25) | 17 (3) | 33-68 (49.6; 50) | 50-95 (69.7; 69) |
| E | South-east | 44.1 | 21 (21) | 38 (29) | 11 (5) | 11-85 (59.5; 64) | 61-110 (82.3; 81) |
| F | North-east | 79 | 14 (11) | 24 (21) | 12 (2) | 22-86 (62.2; 66) | 63-92 (81.4; 84) |
| G | North-east | 122.1 | 65 (58) | 32 (26) | 12 (2) | 19-142 (64.8; 60) | 50-116 (80.5; 80) |
| H1 | South-east | 58.3 | 2 (1) | 5 (5) | 12 (2) | 13-98 (55.8; 54) | 51-119 (84.3; 87) |
| I | North-west | 85.5 | 12 (10) | 16 (15) | 12 (1) | 30-82 (57; 55.5) | 65-107 (81.9; 77) |
| All farms (A-I) |  | Mean = 80.5 | Mean =  25 (21.2) | Mean =  29.2 (24.3) | 131 (27) | 11-293 (71.2; 64) | 46-291 (92.1; 83) |

Key data from nine dairy herds with enzootic pneumonia and 131 calves enrolled in the study.

1Farm H was recruited last minute to replace a farm that cancelled. Although it did not meet the inclusion criteria of 10 calves diagnosed with BRD per year, it was included because calves were regularly diagnosed with BRD.

2All sampled pens were located in the same building for each herd. All pens were connected to each other through gridded fences, except in herd B where they were in three separate locations in the barn.

3Weight of calves was measured using a weight tape.
