# Supplementary material for: Cross-sectional study of calves from Norwegian dairy herds with enzootic pneumonia: pathogen occurrence, antimicrobial resistance, culture result interpretation, and sampling site agreement
Source: Research Square preprint supplement (doi:10.21203/rs.3.rs-6534677/v1), 2025-06-24
Supplement: Supplementary file 4 [file 3049baa8266e459727e980da.docx]

**Additional file 6**

**Table S7:** Clinical scores of 72 healthy and 59 sick calves from nine dairy herds with enzootic pneumonia.

| **Health status** | **Total clinical score** | **Number of calves (n=131)** | **% of total** |
| --- | --- | --- | --- |
| **Healthy (n=72)** | 0 | 7 | 5.3 |
| 1 | 5 | 3.8 |
| 2 | 19 | 14.5 |
| 3 | 16 | 12.2 |
| 4 | 12 | 9.2 |
| 5 | 13 | 9.9 |
| **Sick (n= 59)** | 6 | 7 | 5.3 |
| 7 | 12 | 9.2 |
| 8 | 15 | 11.5 |
| 9 | 5 | 3.8 |
| 10 | 9 | 6.9 |
| 11 | 5 | 3.8 |
| 12 | 0 | 0 |
| 13 | 4 | 3.1 |
| 14 | 1 | 0.8 |
| 15 | 0 | 0 |
| 16 | 0 | 0 |
| 17 | 0 | 0 |
| 18 | 1 | 0.8 |

An overall clinical score (0-18) placed calves in a healthy group (≤ 5) and a sick group (> 5).
