# Supplementary material for: Cross-sectional study of calves from Norwegian dairy herds with enzootic pneumonia: pathogen occurrence, antimicrobial resistance, culture result interpretation, and sampling site agreement
Source: Research Square preprint supplement (doi:10.21203/rs.3.rs-6534677/v1), 2025-06-24
Supplement: Supplementary file 6 [file 905f3fb13929cbc255d3cef7.docx]

**Additional file 5**

**Table S6**: Comparison of phenotypic AMR pattern of *P. multocida* isolates within sample and animal.

| **Herd** | **Animal ID** | **Health status** | **Isolates retrieved (n= 53)** | | | **Susceptibility profile** |
| --- | --- | --- | --- | --- | --- | --- |
| **NS (n=20)** | **NPS (n=17)** | **BAL (n=16)** |
| C | C8 | Sick | 2 | 0 | 1 | All were susceptible to PEN, AMC, STX, TET, ENR, FFC and STREP. |
| B | B3 | Healthy | 0 | 2 | 0 | All were susceptible to PEN, AMC, STX, TET, ENR, FFC; and all were resistant to STREP. |
| E | E7 | Sick | 2 | 2 | 0 |
| E | E10 | Sick | 4 | 3 | 3 |
| F | F3 | Sick | 4 | 4 | 4 |
| F | F11 | Sick | 2 | 1 | 1 |
| G | G1 | Sick | 3 | 1 | 3 |
| I | I10 | Healthy | 1 | 2 | 1 |
| I | I12 | Sick | 2 | 2 | 3 |

The phenotypic AMR patterns of *P. multocida* isolates collected from nasal swabs (NS), nasopharyngeal swabs (NPS), and bronchoalveolar lavage (BAL) samples in nine animals from six herds (n=53 isolates from 23 samples). Out of the 53 isolates in this analysis, one representative isolate per sampling site (n=23) are also included in other analyses in the main study. Additional isolates per sampling site (n=30) are only described in this supplementary analysis.Abbreviations: NS = nasal swabs; NPS = nasopharyngeal swabs; BAL = bronchoalveolar lavage;PEN = penicillin; AMC = amoxicillin-clavulanic acid; STX = trimethoprim + sulfa; TET = tetracycline; ENR = enrofloxacin; FFC = florfenicol; STREP = streptomycin.
