# Supplementary material for: Cross-sectional study of calves from Norwegian dairy herds with enzootic pneumonia: pathogen occurrence, antimicrobial resistance, culture result interpretation, and sampling site agreement
Source: Research Square preprint supplement (doi:10.21203/rs.3.rs-6534677/v1), 2025-06-24
Supplement: Supplementary file 7 [file 97f4fe575cd0be85ac824238.docx]

**Additional file 4**

**Table S5:** Mean percentage fluid return relative to total volume instilled during BAL per culture result.

| **Culture result for *Pasteurellaceae spp.*** | **Percentage BAL fluid return relative to instilled volume** | | | | | | | |
| --- | --- | --- | --- | --- | --- | --- | --- | --- |
| **60ml or ≥100 ml** | |  | **60ml** | |  | **≥100 ml** | |
| n | Mean % (range; SD) |  | n | Mean % (range; SD) |  | n | Mean % (range; SD) |
| **Total (all cultures)** | 93 | 33 (7-63; 13) |  | 79 | 35 (14-63; 12) |  | 14 | 22 (7-47; 10) |
| **Culture negative** | 65 | 35 (7-63; 14) |  | 56 | 37 (15-63; 13) |  | 9 | 22 (7-47; 12) |
| **Culture positive, total** | 28 | 28 (14-47; 9) |  | 23 | 30 (14-47; 10) |  | 5 | 23 (14-28; 5) |
| **Culture positive, < 10 colonies** | 16 | 30 (15-47; 10) |  | 14 | 30 (15-47; 10) |  | 2 | 25 (22-28; 4) |
| **Culture positive, ≥ 10 colonies** | 12 | 27 (14-40; 9) |  | 9 | 30 (14-40; 9) |  | 3 | 22 (14-26; 7) |

Results are based on culture results of *Pasteurellaceae* spp. in 93 calves from nine dairy herds with enzootic pneumonia. Most calves (n=79) were given 60ml during the BAL procedure. The exceptions were 14 calves, including two calves given 100ml, and 12 calves given 120ml, due to a second instilment of 60ml after a failed return of the first 60ml instilled. In calves given 60ml twice, fluid return was calculated based on a total of 120ml. Abbreviation: SD = Standard deviation.
