# Supplementary material for: Cross-sectional study of calves from Norwegian dairy herds with enzootic pneumonia: pathogen occurrence, antimicrobial resistance, culture result interpretation, and sampling site agreement
Source: Research Square preprint supplement (doi:10.21203/rs.3.rs-6534677/v1), 2025-06-24
Supplement: Supplementary file 8 [file a60c56a7532e07bde1190a13.docx]

**Additional file 8**

**Table S9:** Univariable analyses describing the associations between health status and potential predictors.

| Bacterial predictor variables1 | Level (n)3 | β4 | OR4 | SE4 | 95% CI4 | *P4* | N4 |
| --- | --- | --- | --- | --- | --- | --- | --- |
| *P. multocida* detected*,* NS | Negative (69) | - | 1.0 | - | - | - | - |
|  | Positive (62) | 0.49 | 1.64 | 0.71 | 0.70-3.81 | 0.25 | 131 |
| *P. multocida* detected, NPS | Negative (72) | - | 1.0 | - | - | - | - |
|  | Positive (59) | 0.71 | 2.04 | 0.9 | 0.86-4.84 | 0.10 | 131 |
| *P. multocida* dominant, NPS | Negative (80) | - | 1.0 | - | - | - | - |
|  | Positive (51) | 0.45 | 1.57 | 0.68 | 0.67-3.66 | 0.30 | 131 |
| *M. haemolytica* dominant, NS | Negative (104) | - | 1.0 | - | - | - | - |
|  | Positive (27) | -0.79 | 0.45 | 0.23 | 0.17-1.23 | 0.12 | 131 |
| *P. multocida* dominant, abundant, NS | Negative (84) | - | 1.0 | - | - | - | - |
|  | Positive (47) | 0.42 | 1.53 | 0.66 | 0.66-3.55 | 0.33 | 131 |
| *P. multocida* dominant, abundant, BAL | Negative (98) | - | 1.0 | - | - | - | - |
|  | Positive (15) | 1.50 | 4.46 | 3.2 | 1.09-18.17 | 0.04 | 113 |
| **Other predictor variables1,2** |  |  |  |  |  |  |  |
| Agecont | - | -0.00 | 1,0 | 0.00 | 0.99-1.00 | 0.31 | 131 |
| Age | < 60 days(62) | - | 1.0 | - | - | - | - |
|  | ≥ 60 days (69) | 0.01 | 1.01 | 0.40 | 0.46-2.21 | 0.98 | 131 |
| Breed | Norwegian Red (109) | - | 1.0 | - | - | - | - |
|  | Other breeds (22) | -0.46 | 0.63 | 0.39 | 0.19-2.10 | 0.45 | 131 |
| Gender | Female (69) | - | 1.0 | - | - | - | - |
|  | Male (62) | 0.93 | 2.52 | 0.99 | 1.17-5.46 | 0.02 | 131 |

Associations between health status (0 = healthy, baseline; 1 = sick) and predictor variables in 131 calves (72 healthy and 59 sick) from nine dairy herds with enzootic pneumonia. Herd was included as a random effect. Abbreviations: NS = nasal swab; NPS = nasopharyngeal swab; BAL = bronchoalveolar lavage.

1Categorical variables: All bacterial predictor variables; age; breed; and gender

2Continuous variables: Agecont

3Baselines of predictor variables: Bacterial predictor variables = negative; Age = < 60 days; Breed = Norwegian Red; Gender = female

4Model output: β = beta coefficient; OR = odds ratio; SE = standard error; CI = confidence interval; P = p-value; N = sample size.
