# Supplementary material for: Cross-sectional study of calves from Norwegian dairy herds with enzootic pneumonia: pathogen occurrence, antimicrobial resistance, culture result interpretation, and sampling site agreement
Source: Research Square preprint supplement (doi:10.21203/rs.3.rs-6534677/v1), 2025-06-24
Supplement: Supplementary file 9 [file e18a31ca22227212e28e82d9.docx]

**Additional file 9**

**Table S10:** Cross tabulation of *P. multocida* culture results in NS and NPS, relative to BAL.

|  |  | | **Culture result for *P. multocida* in BAL/upper airway site** | | | | | | | | | | | | | | | | | | | | | | |
| --- | --- | --- | --- | --- | --- | --- | --- | --- | --- | --- | --- | --- | --- | --- | --- | --- | --- | --- | --- | --- | --- | --- | --- | --- | --- |
|  |  |  | **Detection in BAL** | | | | | | |  | **Dominant in BAL** | | | | | | | | **Dominant, abundant in BAL** | | | | | | |
| **Health status** | **Upper airway site** | **Culture result for P. multocida** | +/+ | +/- | -/+ | -/- |  | PPV % | NPV % |  | +/+ | +/- | -/+ | -/- |  | PPV % | NPV % |  | +/+ | +/- | -/+ | -/- |  | PPV % | NPV % |
| **Healthy**  **(n=66)** | NS | Detected | 11 | 5 | 17 | 33 |  | **-** | **-** |  | 11 | 2 | 17 | 36 |  | **-** | **-** |  | 5 | 0 | 23 | 38 |  | **-** | **-** |
|  |  | Dominant | 10 | 6 | 13 | 37 |  | **-** | **-** |  | 10 | 3 | 13 | 40 |  | **-** | **-** |  | 5 | 0 | 18 | 43 |  | **-** | **-** |
|  |  | *- Pure1* | *2* | *14* | *2* | *48* |  | **-** | **-** |  | *2* | *11* | *2* | *51* |  | **-** | **-** |  | *0* | *5* | *4* | *57* |  | **-** | **-** |
|  |  | Dominant+ abundant | 9 | 7 | 12 | 38 |  | **-** | **-** |  | 9 | 4 | 12 | 41 |  | **-** | **-** |  | 5 | 0 | 16 | 45 |  | **-** | **-** |
|  | NPS | Detected | 11 | 5 | 14 | 36 |  | **-** | **-** |  | 10 | 3 | 15 | 38 |  | **-** | **-** |  | 5 | 0 | 20 | 41 |  | **-** | **-** |
|  |  | Dominant | 8 | 8 | 14 | 36 |  | **-** | **-** |  | 8 | 5 | 14 | 39 |  | **-** | **-** |  | 4 | 1 | 18 | 43 |  | **-** | **-** |
|  |  | *- Pure1* | *3* | *13* | *6* | *44* |  | **-** | **-** |  | *3* | *10* | *6* | *47* |  | **-** | **-** |  | *0* | *5* | *9* | *52* |  | **-** | **-** |
|  |  | Dominant+ abundant | 3 | 13 | 4 | 46 |  | **-** | **-** |  | 3 | 10 | 4 | 49 |  | **-** | **-** |  | 1 | 4 | 6 | 55 |  | **-** | **-** |
| **Sick**  **(n= 47)** | NS | Detected | 13 | 1 | 12 | 21 |  | **-** | **-** |  | 12 | 0 | 13 | 22 |  | **-** | **-** |  | 10 | 0 | 15 | 22 |  | **-** | **-** |
|  |  | Dominant | 12 | 2 | 10 | 23 |  | **-** | **-** |  | 12 | 0 | 10 | 25 |  | **-** | **-** |  | 10 | 0 | 12 | 25 |  | **-** | **-** |
|  |  | *- Pure1* | *0* | *14* | *2* | *31* |  | **-** | **-** |  | *0* | *12* | *2* | *33* |  | **-** | **-** |  | *0* | *10* | *2* | *35* |  | **-** | **-** |
|  |  | Dominant+ abundant | 12 | 2 | 10 | 23 |  | **-** | **-** |  | 12 | 0 | 10 | 25 |  | **-** | **-** |  | 10 | 0 | 12 | 25 |  | **-** | **-** |
|  | NPS | Detected | 12 | 2 | 11 | 22 |  | **-** | **-** |  | 12 | 0 | 11 | 24 |  | **-** | **-** |  | 10 | 0 | 13 | 24 |  | **-** | **-** |
|  |  | Dominant | 8 | 6 | 11 | 22 |  | **-** | **-** |  | 8 | 4 | 11 | 24 |  | **-** | **-** |  | 6 | 4 | 13 | 24 |  | **-** | **-** |
|  |  | *- Pure1* | *6* | *8* | *7* | *26* |  | **-** | **-** |  | *6* | *6* | *7* | *28* |  | **-** | **-** |  | *5* | *5* | *8* | *29* |  | **-** | **-** |
|  |  | Dominant+ abundant | 8 | 6 | 11 | 22 |  | **-** | **-** |  | 8 | 4 | 11 | 24 |  | **-** | **-** |  | 6 | 4 | 13 | 24 |  | **-** | **-** |

Cross-tabulation of *P. multocida* culture results in upper airway sites relative to BAL (BAL/upper airway site) in 66 healthy and 47 sick calves with paired sampling sites from nine dairy herds with enzootic pneumonia. Values ≥ 80% are underlined. No statistical analyses were done for healthy and sick calves separately due to insufficient sample size at the group level. Abbreviations: NS = nasal swab; NPS = nasopharyngeal swab; BAL = bronchoalveolar lavage; PPV = positive predictive value; NPV = negative predictive value.

1Pure cultures were also part of the “dominant” cultures category.
